# Supplementary material for: U-Pb Dating of the Kolchugino Group Basement (Kuznetsk Coal Basin, Siberia): Was the Change in Early–Middle Permian Floras Simultaneous at Different Latitudes in Angaraland?
Source: MDPI journal article supplement (doi:10.3390/geosciences14010021), 2024-01-09
Supplement: s1 [file s1]

**Table S1.** Results of U-Pb (CA-ID-TIMS) radioisotopic dating of zircon grains from the sample 19kzb-7, Starokuznetsk Formation, Kolchugino Group, Kuznetsk Basin

| Fraction         | Dates (Ma)                          |             |                                     |              |                                      |               |               |                |             | Composition  |             |              | Isotopic Ratios                      |                                     |             |                                     |              |                                      |              |
|------------------|-------------------------------------|-------------|-------------------------------------|--------------|--------------------------------------|---------------|---------------|----------------|-------------|--------------|-------------|--------------|--------------------------------------|-------------------------------------|-------------|-------------------------------------|--------------|--------------------------------------|--------------|
|                  | <sup>206</sup> Pb/ <sup>238</sup> U | +/-2sigma   | <sup>207</sup> Pb/ <sup>235</sup> U | +/-2sigma    | <sup>207</sup> Pb/ <sup>206</sup> Pb | +/-2sigma     | Corr.         | % disc         | Th/U        | Pb* (pg)     | Pbc (pg)    | Pb*/Pbc      | <sup>206</sup> Pb/ <sup>204</sup> Pb | <sup>206</sup> Pb/ <sup>238</sup> U | +/-2sigma   | <sup>207</sup> Pb/ <sup>235</sup> U | +/-2sigma    | <sup>207</sup> Pb/ <sup>206</sup> Pb | +/-2sigma    |
|                  | (a)                                 | abs         | (a)                                 | abs          | (a)                                  | abs           | coef.         | (b)            | (c)         | (d)          | (e)         | (f)          | (g)                                  | (h)                                 | %           | (h)                                 | %            | (h)                                  | %            |
| <b>19kzb-7</b>   |                                     |             |                                     |              |                                      |               |               |                |             |              |             |              |                                      |                                     |             |                                     |              |                                      |              |
| <b>19kzb7-1</b>  | <b>276,96</b>                       | <b>0,32</b> | <b>274,06</b>                       | <b>10,12</b> | <b>249,37</b>                        | <b>97,00</b>  | <b>0,002</b>  | <b>-11,06</b>  | <b>0,97</b> | <b>41,42</b> | <b>2,72</b> | <b>15,24</b> | <b>851,44</b>                        | <b>0,043899</b>                     | <b>0,12</b> | <b>0,309839</b>                     | <b>4,21</b>  | <b>0,051212</b>                      | <b>4,21</b>  |
| 19kzb7-3         | 324,14                              | 1,53        | 319,15                              | 55,47        | 282,88                               | 463,45        | 0,002         | -14,59         | 0,77        | 11,97        | 4,02        | 2,98         | 189,69                               | 0,051567                            | 0,48        | 0,369316                            | 20,25        | 0,051966                             | 20,26        |
| 19kzb7-4         | 307,23                              | 1,51        | 308,61                              | 55,83        | 319,02                               | 476,94        | 0,003         | 3,69           | 0,78        | 21,28        | 7,49        | 2,84         | 181,23                               | 0,048813                            | 0,50        | 0,355178                            | 20,98        | 0,052796                             | 20,98        |
| 19kzb7-5         | 282,38                              | 0,98        | 285,57                              | 31,50        | 311,78                               | 288,11        | 0,004         | 9,43           | 1,10        | 19,57        | 3,84        | 5,09         | 288,69                               | 0,044778                            | 0,35        | 0,324778                            | 12,66        | 0,052628                             | 12,66        |
| 19kzb7-6         | 279,03                              | 0,97        | 279,41                              | 36,88        | 282,63                               | 345,48        | 0,003         | 1,27           | 1,43        | 14,45        | 3,11        | 4,65         | 248,15                               | 0,044235                            | 0,36        | 0,316767                            | 15,10        | 0,051960                             | 15,10        |
| 19kzb7-7         | 298,37                              | 1,10        | 304,86                              | 40,68        | 354,80                               | 348,95        | 0,004         | 15,90          | 0,91        | 17,57        | 4,48        | 3,93         | 235,94                               | 0,047372                            | 0,38        | 0,350178                            | 15,45        | 0,053636                             | 15,45        |
| <b>19kzb7-8</b>  | <b>276,74</b>                       | <b>1,89</b> | <b>254,91</b>                       | <b>72,22</b> | <b>58,51</b>                         | <b>763,87</b> | <b>0,005</b>  | <b>-373,01</b> | <b>1,66</b> | <b>8,98</b>  | <b>3,56</b> | <b>2,52</b>  | <b>137,67</b>                        | <b>0,043865</b>                     | <b>0,70</b> | <b>0,285367</b>                     | <b>32,04</b> | <b>0,047204</b>                      | <b>32,04</b> |
| <b>19kzb7-9</b>  | <b>276,95</b>                       | <b>0,84</b> | <b>275,83</b>                       | <b>32,18</b> | <b>266,26</b>                        | <b>305,76</b> | <b>-0,002</b> | <b>-4,01</b>   | <b>1,24</b> | <b>21,88</b> | <b>4,30</b> | <b>5,09</b>  | <b>280,49</b>                        | <b>0,043899</b>                     | <b>0,31</b> | <b>0,312123</b>                     | <b>13,32</b> | <b>0,051590</b>                      | <b>13,33</b> |
| 19kzb7-10        | 280,08                              | 1,62        | 265,25                              | 62,97        | 136,19                               | 633,96        | 0,002         | -105,65        | 1,05        | 10,17        | 4,00        | 2,54         | 155,49                               | 0,044405                            | 0,59        | 0,298524                            | 26,98        | 0,048780                             | 26,98        |
| <b>19kzb7-11</b> | <b>276,16</b>                       | <b>1,15</b> | <b>269,12</b>                       | <b>43,73</b> | <b>208,31</b>                        | <b>429,02</b> | <b>0,004</b>  | <b>-32,57</b>  | <b>1,27</b> | <b>15,21</b> | <b>4,02</b> | <b>3,78</b>  | <b>212,08</b>                        | <b>0,043770</b>                     | <b>0,43</b> | <b>0,303485</b>                     | <b>18,50</b> | <b>0,050310</b>                      | <b>18,50</b> |
| <b>19kzb7-13</b> | <b>276,65</b>                       | <b>1,25</b> | <b>275,09</b>                       | <b>47,90</b> | <b>261,85</b>                        | <b>456,56</b> | <b>0,002</b>  | <b>-5,65</b>   | <b>1,66</b> | <b>33,72</b> | <b>9,02</b> | <b>3,74</b>  | <b>194,57</b>                        | <b>0,043849</b>                     | <b>0,46</b> | <b>0,311170</b>                     | <b>19,88</b> | <b>0,051491</b>                      | <b>19,88</b> |
| 19kzb7-14        | 278,46                              | 1,09        | 277,34                              | 41,48        | 267,90                               | 392,14        | 0,002         | -3,94          | 1,32        | 16,38        | 4,06        | 4,04         | 222,68                               | 0,044142                            | 0,40        | 0,314078                            | 17,09        | 0,051627                             | 17,10        |

(a) Isotopic dates calculated using the decay constants lambda238 = 1.55125E-10 and lambda235 = 9.8485E-10

(b) % discordance = 100 - (100 \* (<sup>206</sup>Pb/<sup>238</sup>U date) / (<sup>207</sup>Pb/<sup>206</sup>Pb date))

(c) Th contents calculated from radiogenic <sup>208</sup>Pb and the <sup>207</sup>Pb/<sup>206</sup>Pb date of the sample and assuming concordance between U-Th and Pb systems.

(d) Total mass of radiogenic Pb.

(e) Total mass of common Pb.

(f) Ratio of radiogenic Pb (including <sup>208</sup>Pb) to common Pb.

(g) Measured ratio corrected for fractionation and spike contribution only.

(h) Measured ratios corrected for fractionation and tracer and blank.
